# Supplementary material for: Tinnitus and associations with chronic pain: The population-based Tromsø Study (2015–2016)
Source: PubMed Central journal article supplement (PMC7924755; doi:10.1371/journal.pone.0247880), 2021-03-02

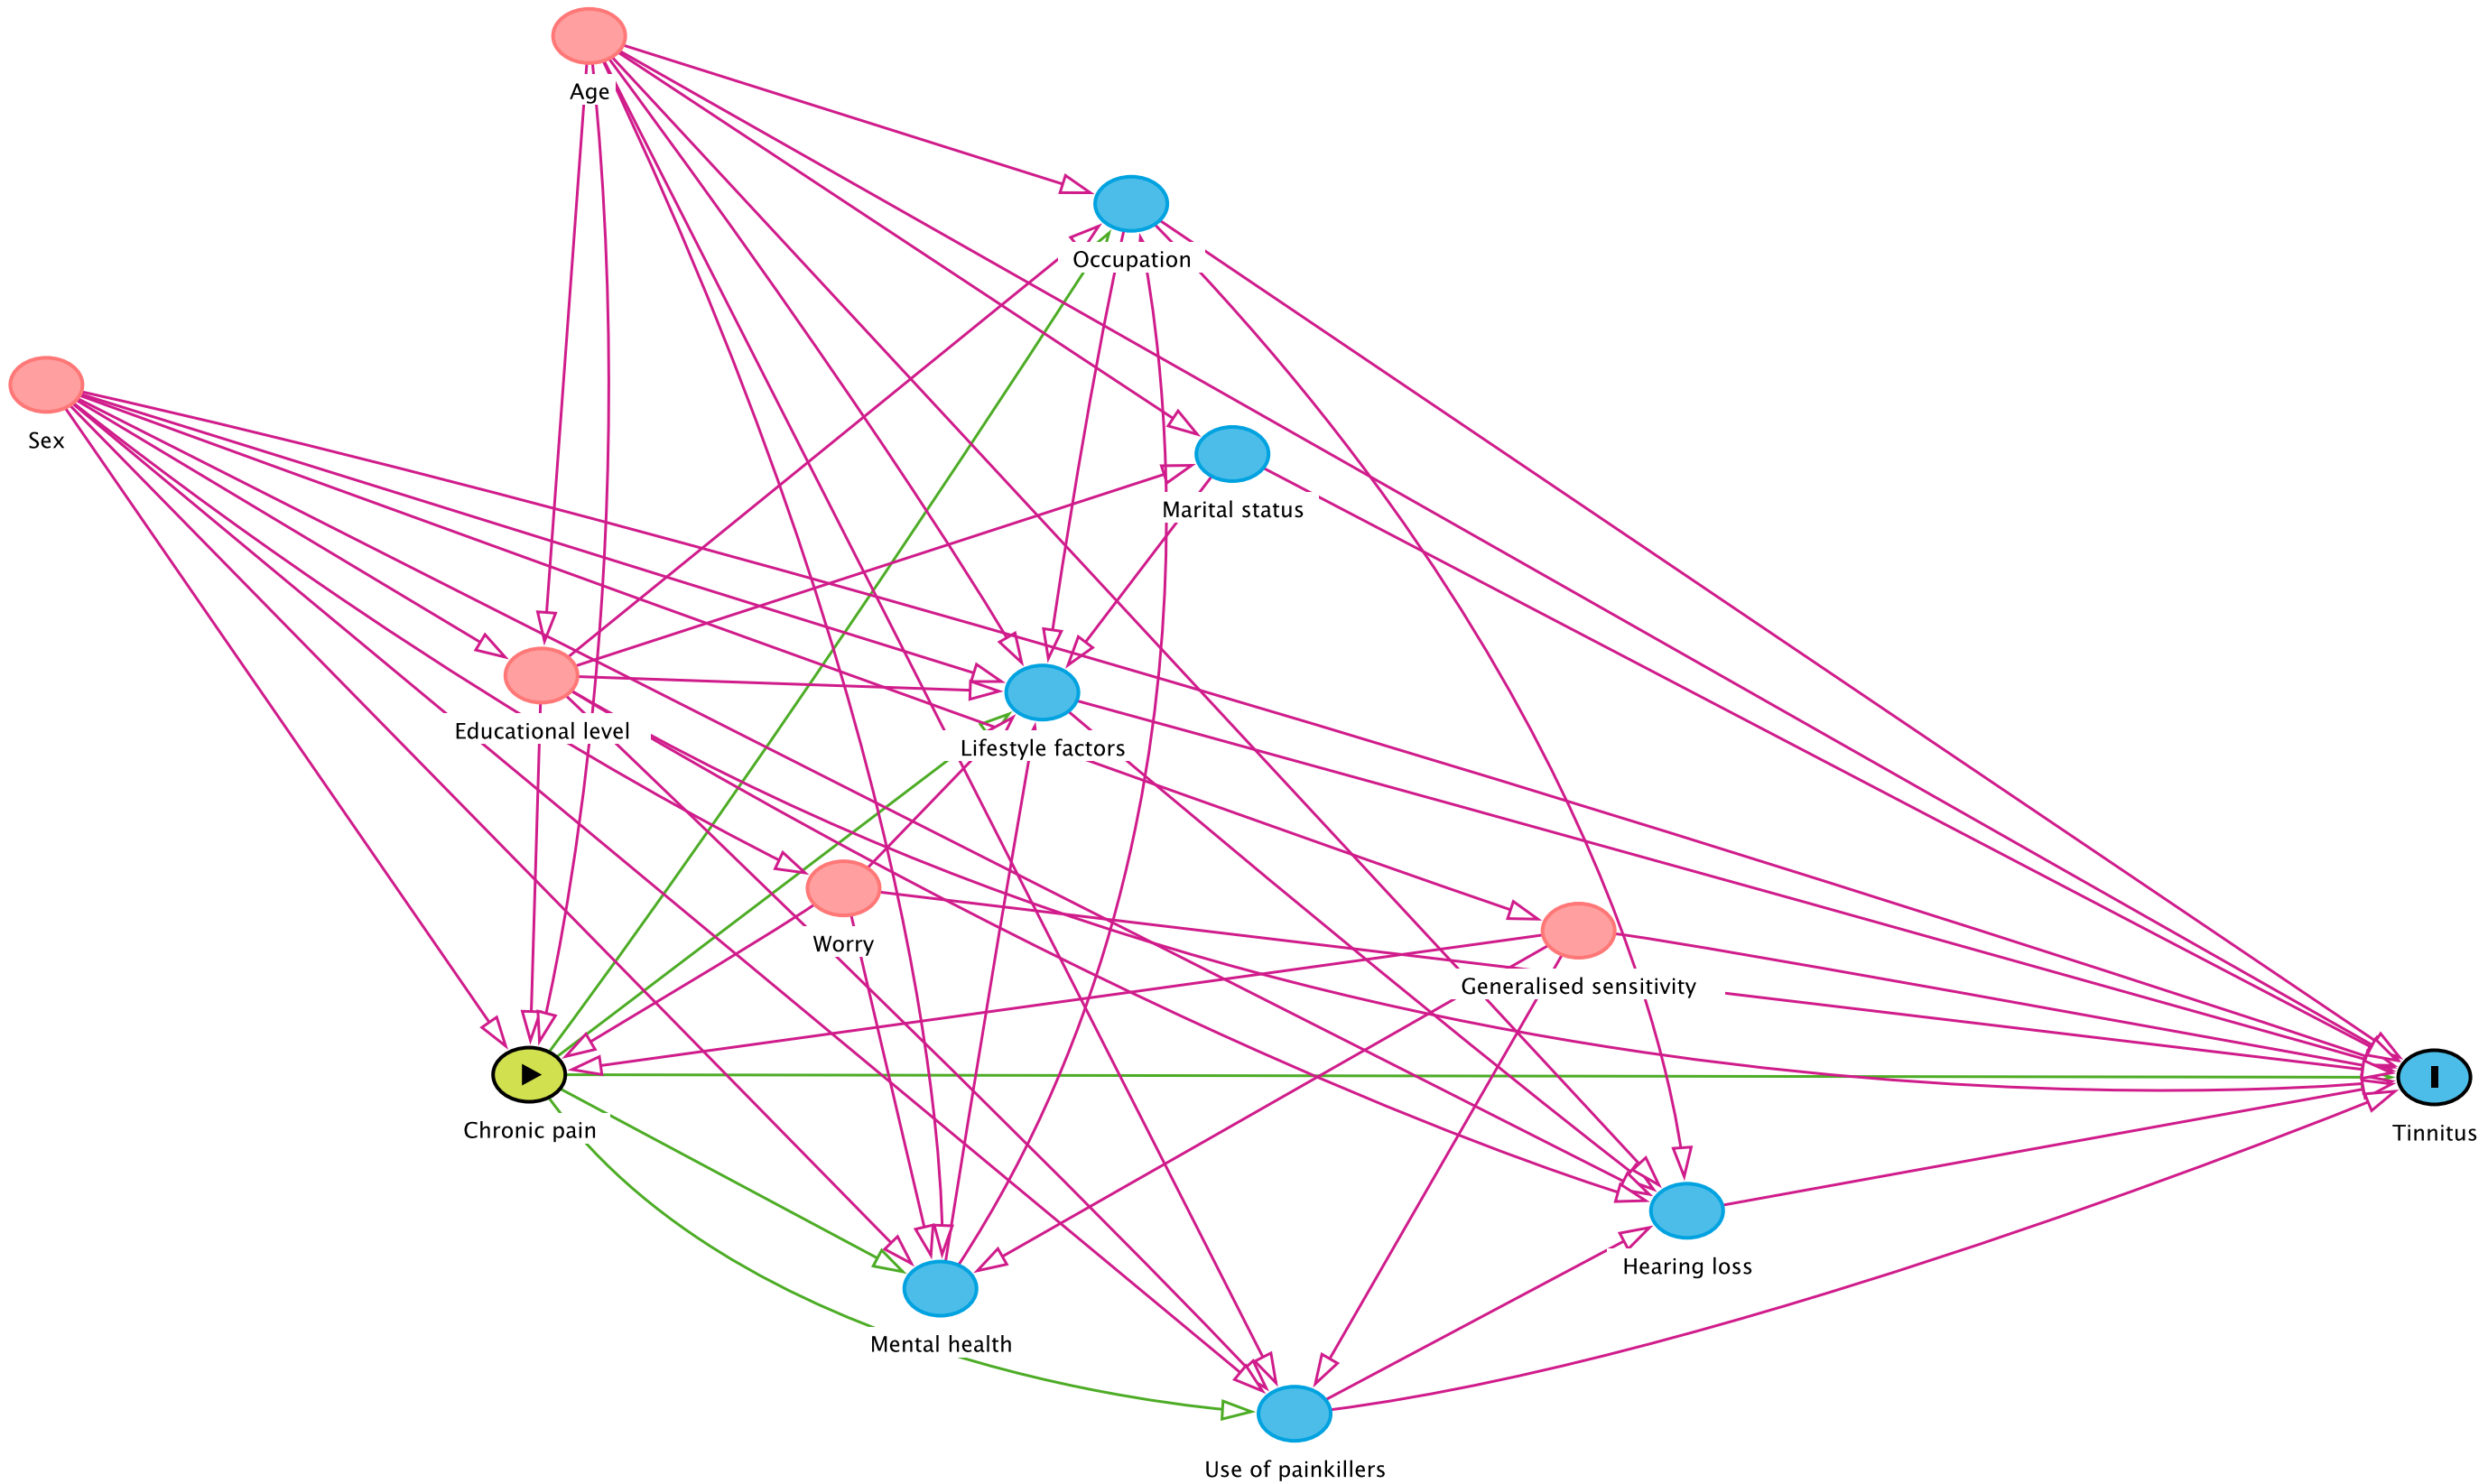

Supplement: pone.0247880.s001.pdf [file pone.0247880.s001.pdf]
