# Supplementary material for: Tinnitus and associations with chronic pain: The population-based Tromsø Study (2015–2016)
Source: PubMed Central journal article supplement (PMC7924755; doi:10.1371/journal.pone.0247880), 2021-03-02
Supplement: pone.0247880.s005.pdf [file pone.0247880.s005.pdf]

|                                              | <b>Tinnitus prevalence</b> |                                                                       |                                                   |                                                          |                     |
|----------------------------------------------|----------------------------|-----------------------------------------------------------------------|---------------------------------------------------|----------------------------------------------------------|---------------------|
|                                              | Tinnitus >5 minutes        | At least weekly, (at least) a little bothersome tinnitus <sup>1</sup> | At least weekly, bothersome tinnitus <sup>2</sup> | At least weekly, highly bothersome tinnitus <sup>3</sup> |                     |
|                                              | <b>n (%)</b>               | <b>n (%)</b>                                                          | <b>n (%)</b>                                      | <b>n (%)</b>                                             | <b>Total (100%)</b> |
| <b>Chronic pain <sup>4</sup></b>             |                            |                                                                       |                                                   |                                                          |                     |
| No                                           | 1 237 (16.6)               | 581 (7.8)                                                             | 162 (2.2)                                         | 41 (0.6)                                                 | 7 450               |
| Yes                                          | 2 740 (23.6)               | 1 394 (12.0)                                                          | 491 (4.2)                                         | 161 (1.4)                                                | 11 589              |
| <b>Sex</b>                                   |                            |                                                                       |                                                   |                                                          |                     |
| Female                                       | 1 604 (16.2)               | 784 (7.9)                                                             | 273 (2.8)                                         | 84 (0.9)                                                 | 9 900               |
| Male                                         | 2 373 (26.0)               | 1 191 (13.0)                                                          | 380 (4.2)                                         | 118 (1.3)                                                | 9 139               |
| <b>Age (years)</b>                           |                            |                                                                       |                                                   |                                                          |                     |
| 40–54                                        | 1 631 (18.2)               | 696 (7.7)                                                             | 231 (2.6)                                         | 72 (0.8)                                                 | 8 987               |
| 55–64                                        | 1 165 (22.6)               | 601 (11.7)                                                            | 196 (3.8)                                         | 55 (1.1)                                                 | 5 154               |
| 65–74                                        | 884 (24.5)                 | 499 (13.8)                                                            | 161 (4.5)                                         | 54 (1.5)                                                 | 3 615               |
| 75 or older                                  | 297 (23.2)                 | 179 (14.0)                                                            | 65 (5.1)                                          | 21 (1.6)                                                 | 1 283               |
| <b>Education</b>                             |                            |                                                                       |                                                   |                                                          |                     |
| Primary/partly secondary                     | 887 (21.4)                 | 530 (12.8)                                                            | 213 (5.1)                                         | 75 (1.8)                                                 | 4 140               |
| Upper secondary                              | 1 187 (22.4)               | 596 (11.2)                                                            | 213 (4.0)                                         | 68 (1.3)                                                 | 5 310               |
| Tertiary                                     | 1 903 (19.9)               | 849 (8.9)                                                             | 227 (2.4)                                         | 59 (0.6)                                                 | 9 589               |
| <b>Noise sensitivity <sup>5</sup></b>        |                            |                                                                       |                                                   |                                                          |                     |
| Strongly disagree/disagree/slightly disagree | 1 209 (15.8)               | 507 (6.6)                                                             | 139 (1.8)                                         | 44 (0.6)                                                 | 7 674               |
| Slightly agree/agree                         | 2 005 (22.2)               | 998 (11.0)                                                            | 310 (3.4)                                         | 77 (0.9)                                                 | 9 042               |
| Strongly agree                               | 763 (32.9)                 | 470 (20.2)                                                            | 204 (8.8)                                         | 81 (3.5)                                                 | 2 323               |
|                                              |                            |                                                                       |                                                   |                                                          |                     |
| <b>Worry (range 3–15) (mean (SD))</b>        | 4.8 (2.4)                  | 5.0 (2.6)                                                             | 5.3 (2.8)                                         | 5.5 (3.1)                                                | 4.7 (2.3)           |
|                                              |                            |                                                                       |                                                   |                                                          |                     |
| <b>Total</b>                                 | <b>3 977 (21.0)</b>        | <b>1 975 (10.4)</b>                                                   | <b>653 (3.4)</b>                                  | <b>202 (1.1)</b>                                         | <b>19 039</b>       |
