# Supplementary material for: Tinnitus and associations with chronic pain: The population-based Tromsø Study (2015–2016)
Source: PubMed Central journal article supplement (PMC7924755; doi:10.1371/journal.pone.0247880), 2021-03-02
Supplement: pone.0247880.s006.pdf [file pone.0247880.s006.pdf]

|                                  |        | <b>Covariate</b> |         |                   |        |
|----------------------------------|--------|------------------|---------|-------------------|--------|
| <b>Independent variable</b>      | n      | Sex              | Age     | Noise sensitivity | Worry  |
| Chronic pain                     | 19,039 | p=0.16           | p=0.02  | p=0.64            | p=0.43 |
| Number of body regions with pain | 11,589 | p=0.93           | p=0.03  | p=0.56            | p=0.26 |
| Highest reported pain intensity  | 11,589 | p=0.82           | p<0.001 | p=0.65            | p=0.49 |
| Highest reported bothering       | 11,589 | p=0.70           | p<0.001 | p=0.50            | p=0.27 |
